# Supplementary material
Source: publisher figshare collection journal article supplement (https://acs.figshare.com/ndownloader/files/25792006)
Supplement: Supplementary file 1 [file 25792006]

## Support Information

# Bifunction Interfacial Modification Engineering with Biomimetic Perfluoro-copolymer-enabled High-Efficiency and Moisture-resistant Perovskite Solar Cells

*Qian Ye<sup>#, \*</sup>, He Yang<sup>#</sup>, Jin Zhang, Meijuan Long, Pengfei Guo, Hongqiang Wang<sup>\*</sup>*

State Key Laboratory of Solidification Processing, Center of Advanced Lubrication and Seal Materials, School of Materials Science and Engineering, Northwestern Polytechnical University, Xi'an, 710072, P. R. China.

*<sup>#</sup>These authors contribute equally to this work.*

\*E-mail: yeqian213@nwpu.edu.cn (Qian Ye), hongqiang.wang@nwpu.edu.cn

(Hongqiang Wang)

# Contents

|           |     |
|-----------|-----|
| Figure S1 | S-3 |
| Figure S2 | S-3 |
| Figure S3 | S-3 |
| Figure S4 | S-4 |
| Figure S5 | S-4 |
| Figure S6 | S-5 |
| Figure S7 | S-5 |
| Table S1  | S-6 |
| Table S2  | S-6 |

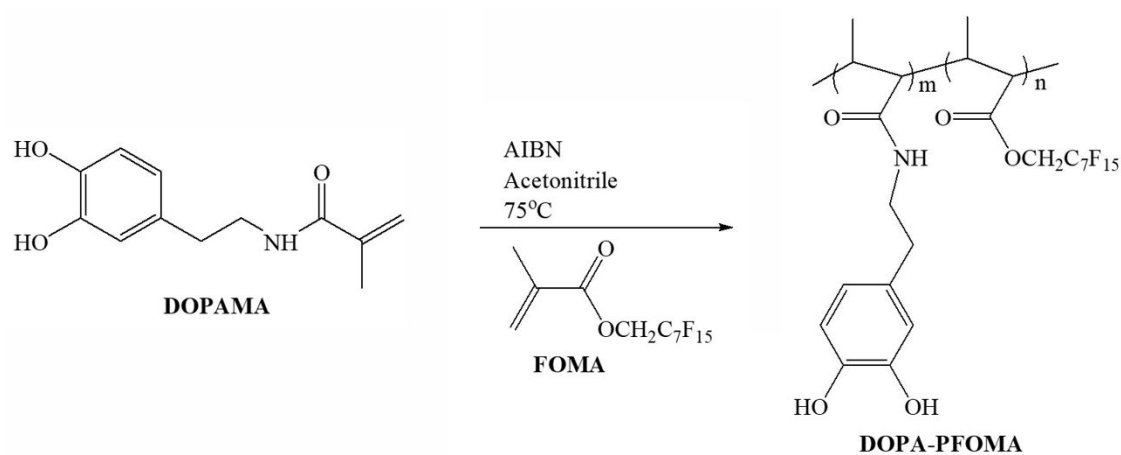

**Figure S1.** The synthesis process of PFOMA.

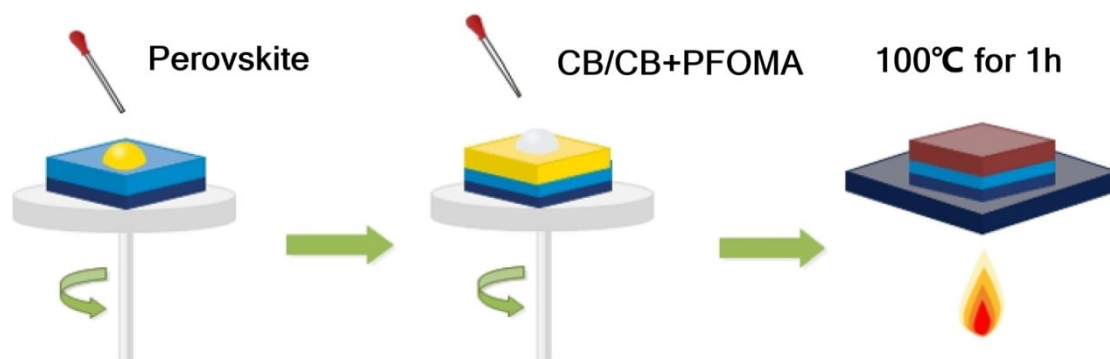

**Figure S2.** Schematic illustration of the fabrication process of PFOMA-modified PSCs.

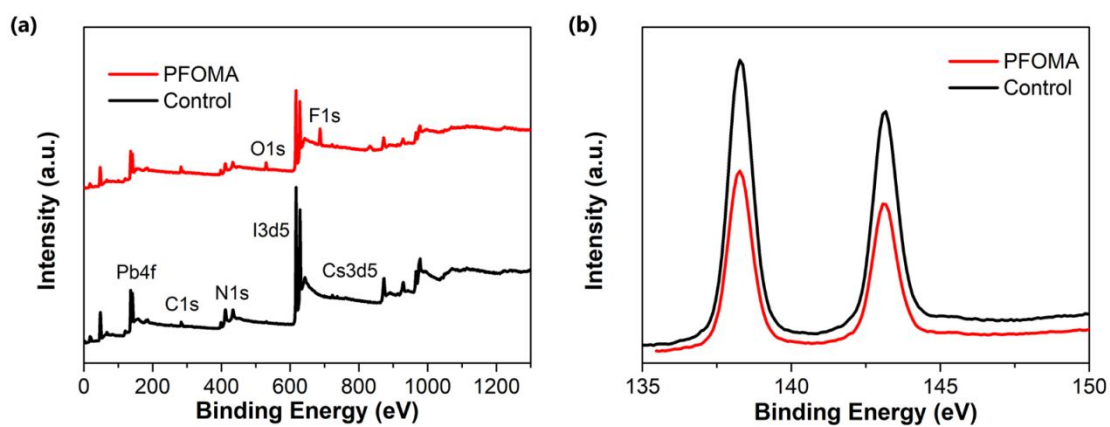

**Figure S3.** XPS spectra of control group and PFOMA-modified PSCs for (a) all elements and (b) lead.

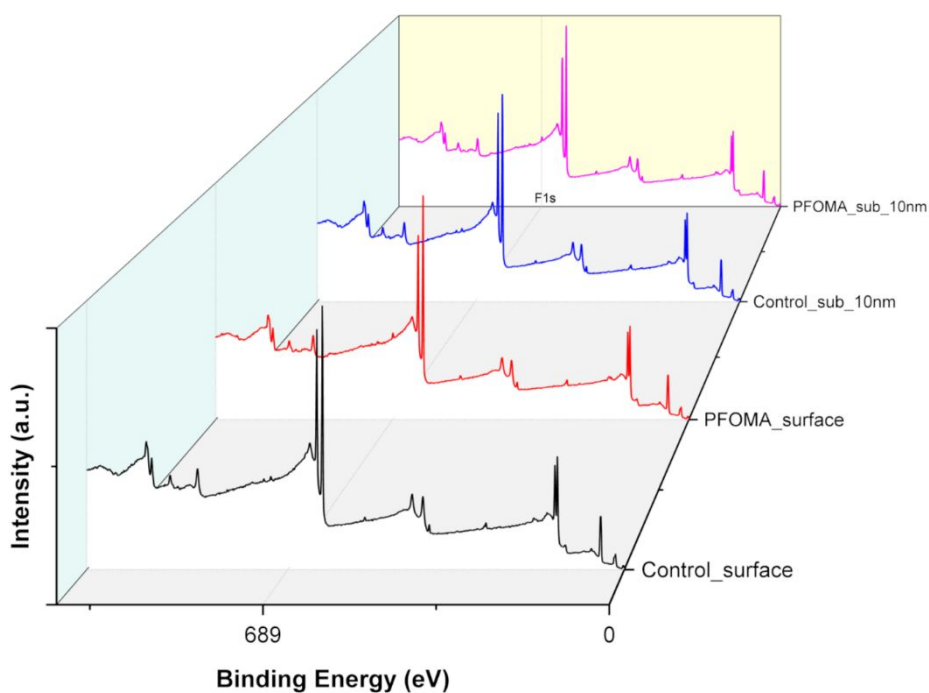

**Figure S4.** XPS image for perovskite film surface and 10 nm beneath in control group and PFOMA-modified group respectively. The F1s peak is shown at around 689 eV.

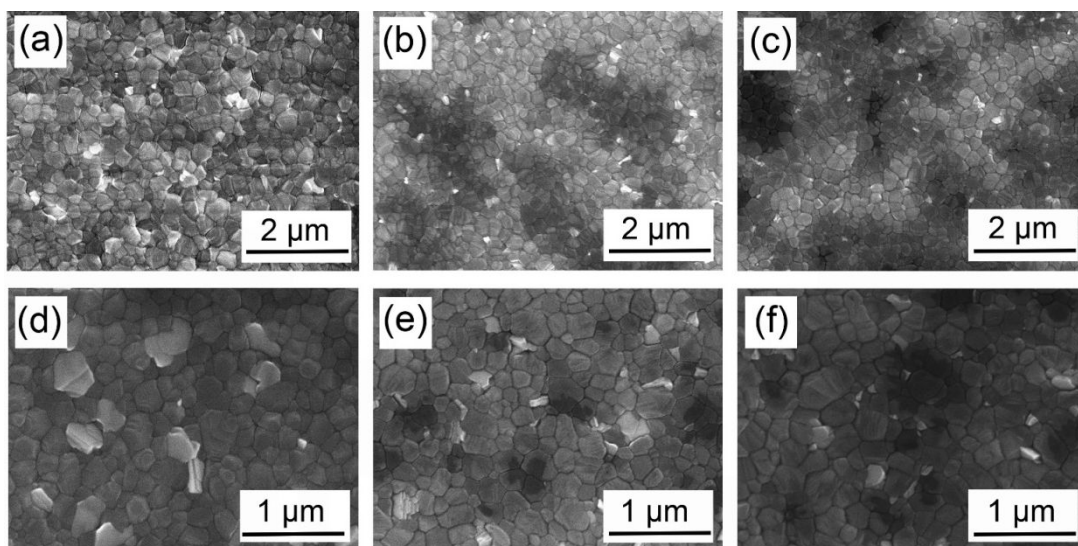

**Figure S5.** (a)-(c) SEM images of perovskite films in (a) control groups, (b) 0.10 mg/mL PFOMA and (c) 0.15 mg/mL PFOMA-modified PSCs under the magnification of 50000x (2 μm). (d)-(f) SEM images of perovskite films in (d) control groups, (e) 0.10 mg/mL PFOMA and (f) 0.15 mg/mL PFOMA-modified PSCs under the magnification of 100000x (1 μm).

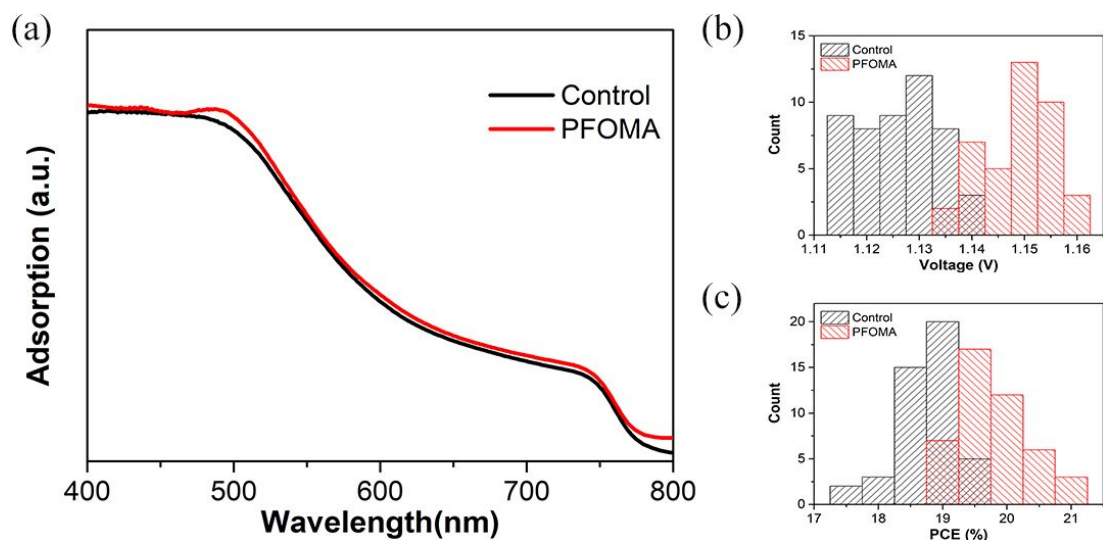

**Figure S6.** (a) UV-Vis spectra of perovskite films in control group devices and PFOMA-modified devices. Histogram of (b)  $V_{OC}$  distribution and (c) PCE distribution of control group devices and optimized PFOMA-modified devices.

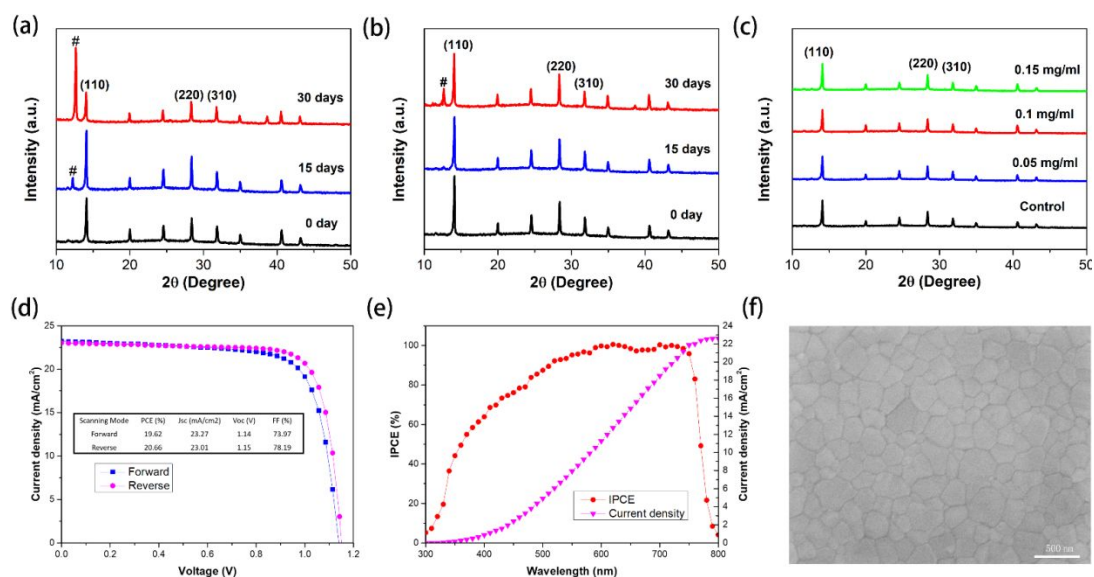

**Figure S7.** XRD patterns of perovskite films for (a) control group devices and (b) PFOMA-modified devices after 0 day, 15 days and 30 days in storage under  $70 \pm 5\%$  relative humidity respectively. (c) XRD patterns of original perovskite films in control group devices and modified devices with different PFOMA concentrations in CB. (d) J-V curves of a champion PSC device in 0.1 mg/mL-PFOMA-modified group under reverse and forward scanning (insert is the table for the performance parameters). (e) IPCE and integrated current density curves of the champion device. (f) SEM picture of the champion device perovskite film.

**Table S1.** Typical performance of PSC devices before and after PFOMA modification

|            | Scanning Mode | PCE (%) | $J_{SC}$ (mA/cm <sup>2</sup> ) | $V_{OC}$ (V) | $FF$ (%) | Hysteresis index |
|------------|---------------|---------|--------------------------------|--------------|----------|------------------|
| Control    | Forward       | 15.89   | 21.96                          | 1.12         | 64.69    | 0.117            |
|            | Reverse       | 18.00   | 21.65                          | 1.12         | 73.49    |                  |
| PFOMA-PSCs | Forward       | 18.68   | 22.01                          | 1.14         | 73.97    | 0.038            |
|            | Reverse       | 19.42   | 21.86                          | 1.15         | 77.67    |                  |

**Table S2.** Parameters of TRPL spectra for the control and PFOMA-modified PSCs

|             | $\tau_1$ (ns) | $\tau_2$ (ns) |
|-------------|---------------|---------------|
| Control     | 23            | 98            |
| PFOMA- PSCs | 45            | 121           |
